# Supplementary material
Source: publisher figshare collection journal article supplement (https://tandf.figshare.com/articles/dataset/_/10259951)
Supplement: Supplementary file 1 [file 1]

Health Professionals' and Women's Health Information Needs  
INTERVIEW SCHEDULE

XXXX

*The purpose of the interview is to establish how health professionals and their patients view these two conditions, the quality of existing health education resources for women, and how these resources might be improved.*

*Your comments will help us develop information and support resources that meet women's needs, and are not in any way an evaluation of your service*

*Your participation is entirely voluntary. Have you read the participation information statement? Do you consent to participate? Do I have your consent to audio-record the interview to ensure accuracy of the interview responses?*

**TURN ON RECORDER with consent**

**I'll begin by asking you for a few details about your professional background and area of practice**

1. What country were you born in?
2. What is your professional discipline (*medicine: general practice; O&G/other, nursing, etc.*)?
3. In what kind of a setting do you work? *Prompt: hospital, private practice, community clinic, university health service, other, diversity of patients/LOTE/CALD low SES, etc.)*
4. What proportion of your practice/how often do you see women for problems associated with endometriosis/menopause?
5. Signed Consent Form? (Received Y/N)

**We are interested in your professional opinions about women's and health care providers' needs for resources for managing endometriosis/ menopause**

1. What is a woman's usual presenting gynaecological problem/ what is a woman usually seeking help for? What are the most common things that women complain about? Are there differences related to cultural background?
2. Tell me about the most recent/difficult case/person who presented with a problem you thought might be associated with menopause/endometriosis.
3. What do you offer women? (medical, surgical/referral/info resources/re-framing?)
4. How satisfied do you think women are with these suggestions?
5. What endometriosis/menopause information sources do you use in your practice? (*Prompt: toolkits, Cochrane summaries?/products/pharma materials? Jean Hailes endo/meno toolkits?*)
6. What resources would assist you? (information, skills, knowledge, techniques, resources). How would you like to receive the resources? (written online; workshop?)
7. What information and/or support resources do you recommend for women?  
*Prompt: how could they be improved?*  
*Prompt: specifically for Women with CALD backgrounds, low SES, low literacy etc.)*
