# Supplementary material
Source: publisher figshare collection journal article supplement (https://tandf.figshare.com/articles/dataset/_/10259951)
Supplement: Supplementary file 3 [file 1]

Supplemental Table 1. Characteristics of online discussion group participants (n=21 completed surveys/46 participants)

| <b>Characteristic</b>                                             | <b>Mean; n(%)</b> |
|-------------------------------------------------------------------|-------------------|
| Mean age in years (range)                                         | 31 (21-62)        |
| Mean age at diagnosis in years (range)                            | 25 (17-39).       |
| Not diagnosed with endometriosis                                  | 1 (5%)            |
| Born in Australia                                                 | 17 (81%)          |
| Speak a language other than English at home                       | 3 (14%)           |
| Highest level of education                                        |                   |
| Secondary school                                                  | 2 (10%)           |
| Post-secondary trade, certificate, diploma                        | 7 (33%)           |
| Undergraduate degree                                              | 5 (24%)           |
| Postgraduate degree                                               | 7 (33%)           |
| Worst endometriosis pain experienced (mild-moderate-severe); n=20 | 18 (90%) severe   |
| Never given birth                                                 | 17 (81%)          |
| Never tried for > 1 year to conceive without success              | 17 (81%)          |

Supplemental Table 2 Characteristics of interview participants

| HEALTH<br>PROFESSIONAL<br># | COUNTRY<br>OF BIRTH    | DISCIPLINE                | SETTING                                                                                |
|-----------------------------|------------------------|---------------------------|----------------------------------------------------------------------------------------|
| 1                           | Australia              | General Practitioner (GP) | university health service; ages 17-65; 30% international students all ages             |
| 2                           | Australia              | GP                        | large group practice, mono-cultural                                                    |
| 3                           | Iraq                   | GP registrar              | large regional practice; high patient diversity; especially socioeconomic status (SES) |
| 4                           | Australia              | GP                        | mid-sized metropolitan clinic; ethnically diverse                                      |
| 5                           | Malaysia               | GP                        | regional practice, mixed SES                                                           |
| 6                           | UK                     | GP                        | group practice; high proportion lower SES                                              |
| 7                           | Bangladesh             | GP                        | rural setting; multilingual community ; mixed SES                                      |
| 8                           | Dubai; Indian heritage | GP                        | private practice; regional city; mixed SES                                             |

|    |           |                                                               |                                                                                                           |
|----|-----------|---------------------------------------------------------------|-----------------------------------------------------------------------------------------------------------|
| 9  | Australia | GP special interest in women's health                         | metropolitan practice; high SES                                                                           |
| 10 | UK        | GP; former paediatrician                                      | regional city; diverse SES and education; culturally diverse including Australian Aboriginal              |
| 11 | Sweden    | GP                                                            | regional city; mixed cultural background and SES                                                          |
| 12 | Australia | Gynaecology; advanced laparoscopy                             | private specialist practice; inner Melbourne metropolitan                                                 |
| 13 | England   | GP; aboriginal remote community and refugee health experience | Aboriginal Health Service regional city; social welfare support; public chronic pain service; diverse SES |
