# Supplementary material
Source: publisher figshare collection journal article supplement (https://tandf.figshare.com/articles/dataset/_/10259951)
Supplement: Supplementary file 4 [file 1]

Archive with 3 entries (3 files):
- ipob_a_1678022_sm8886.pdf
- ipob_a_1678022_sm8874.pdf
- ipob_a_1678022_sm8856.pdf
